# Supplementary material for: Crystal structure, optical spectroscopy and energy transfer properties in NaZnPO4:Ce3+, Tb3+ phosphors for UV-based LEDs
Source: Royal Society of Chemistry journal article supplement (doi:10.1039/d0ra04163g), 2020-01-01
Supplement: d0ra04163g1.pdf [file d0ra04163g1.pdf]

**Crystal structure, optical spectroscopy and energy transfer  
properties in NaZnPO<sub>4</sub>:Ce<sup>3+</sup>, Tb<sup>3+</sup> phosphors for UV- based LEDs**

**K. Saidi, M. Dammak**

- (a) Université de Sfax, Laboratoire de Physique Appliquée, Groupe de Physique des matériaux luminescents, Faculté des Sciences de Sfax, Département de Physique, 3018 Sfax, Tunisie.

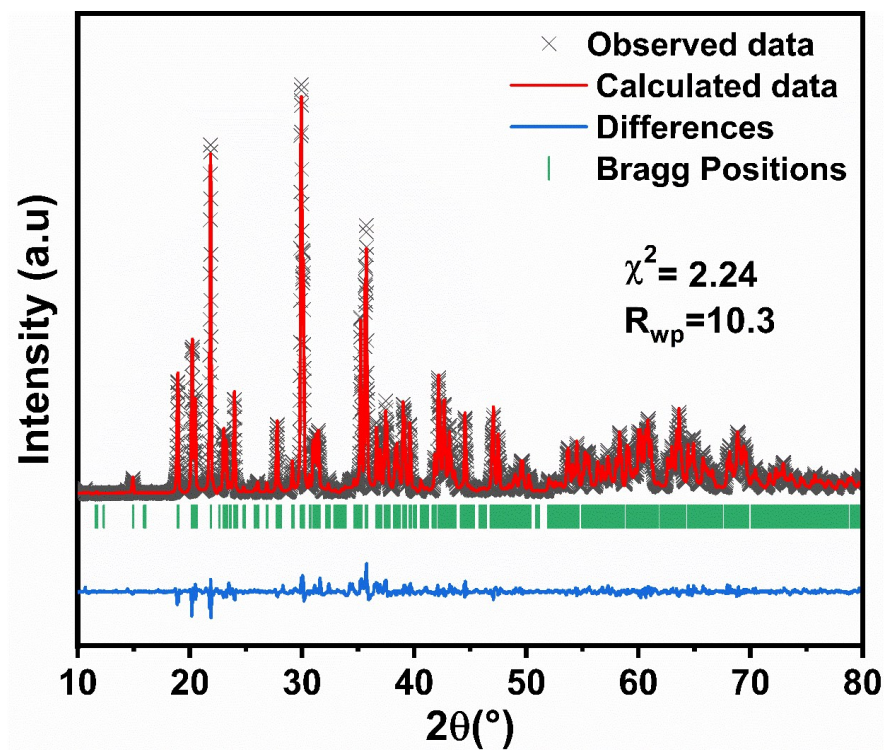

Fig. S1. Rietveld refinement of the XRD structure of NZPO.

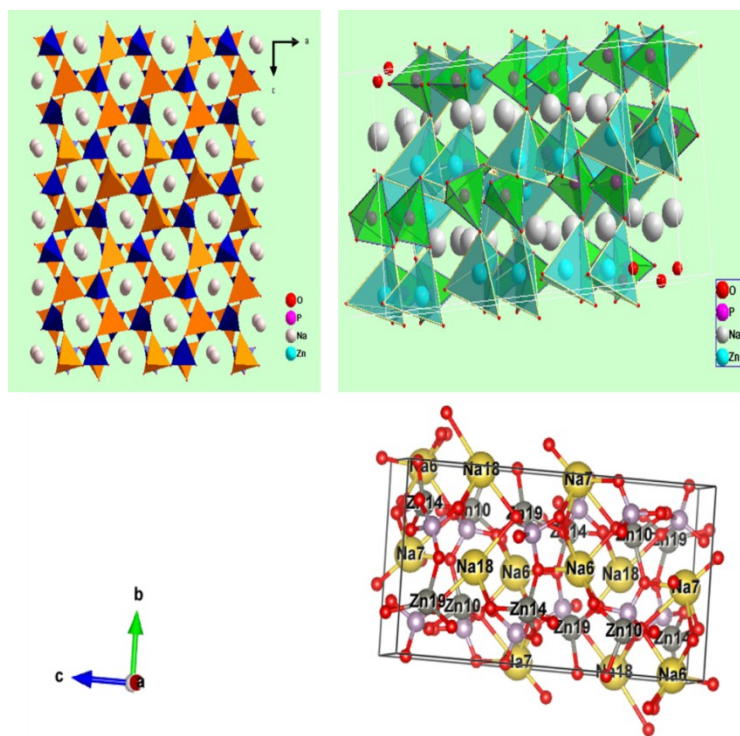

Fig.S2. Schematic illustration of the crystal structure of NZPO.

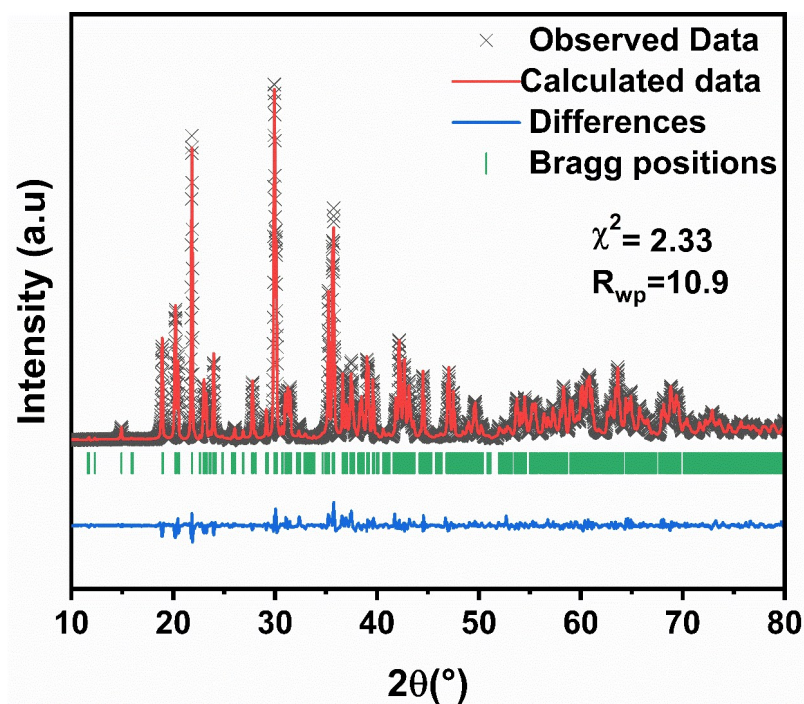

Fig S3: Rietveld refinement of XRD data for NZPO 0.05 Ce<sup>3+</sup>.

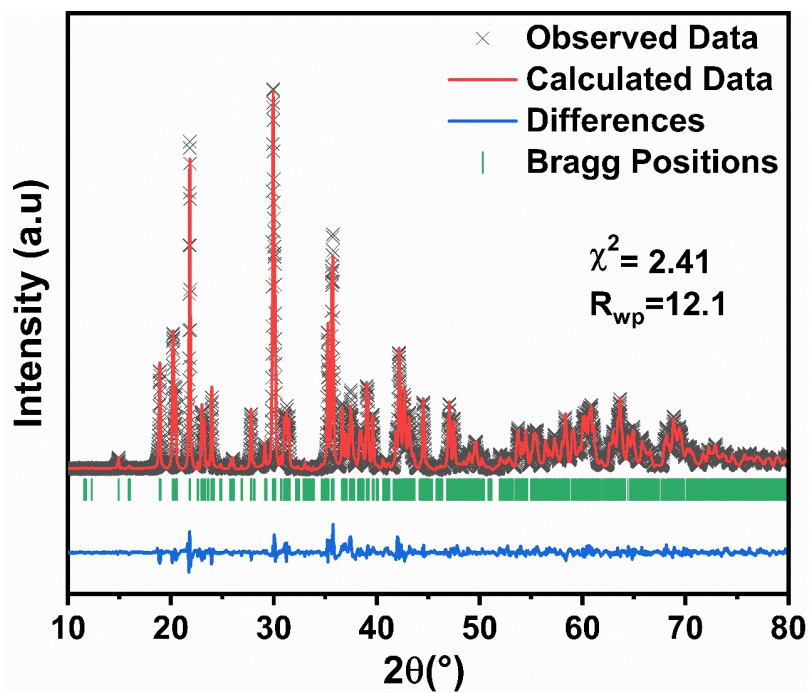

Fig S4: Rietveld refinement of XRD data for NZPO 0.08 Tb<sup>3+</sup>.

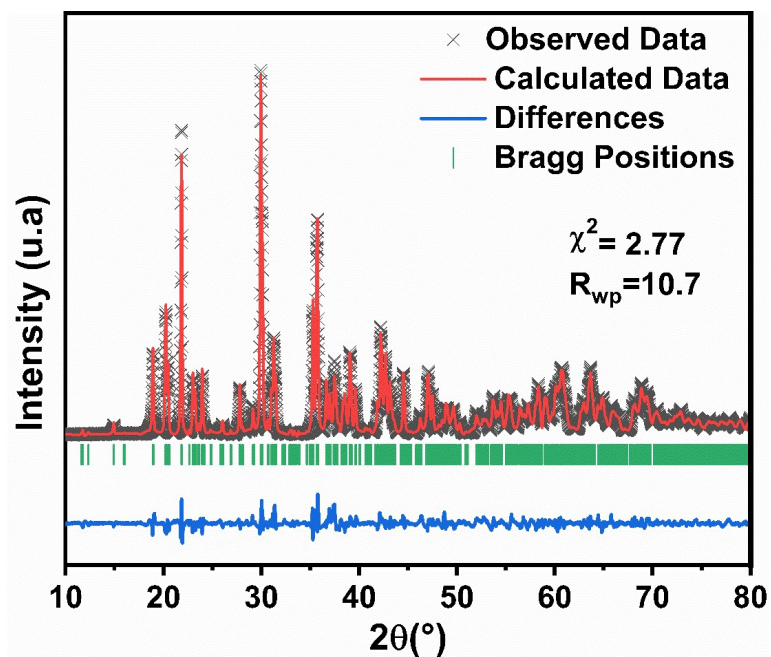

Fig S5: Rietveld refinement of XRD data for NZPO 0.05 Ce<sup>3+</sup> 0.01Tb<sup>3+</sup>.

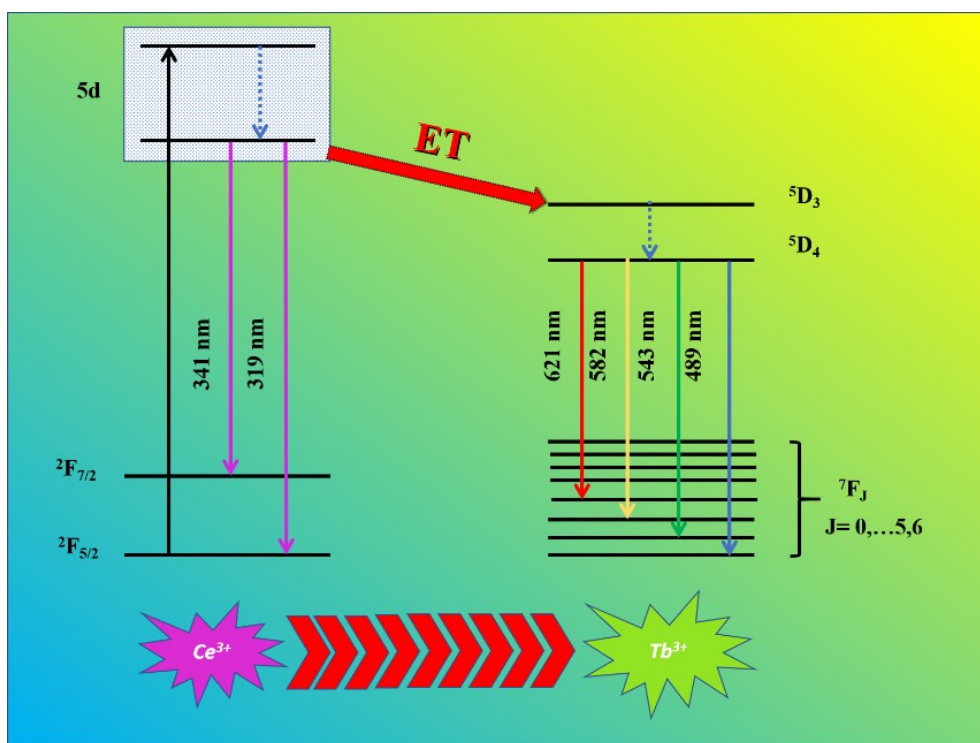

Fig.S6. Energy transfer processes between Ce<sup>3+</sup> and Tb<sup>3+</sup> ions.

**Table S1. Structural Data of NaZnPO<sub>4</sub> from the Rietveld Refinement.**

---

**Cryst syst : monoclinic**

**Z=4**

**Space group P2<sub>1</sub>/n**

**a =8.6681 Å**

**b= 8.1316 Å**

**c= 15.2591 Å**

**$\alpha=90^\circ$**

**$\beta =89.8007^\circ$**

**$\gamma=90^\circ$**

**V=1075.548 Å<sup>3</sup>**

**R<sub>wp</sub>= 10.3 %**

---

**Table S2. Atom Coordinates of NaZnPO<sub>4</sub>**

| No. | Elem. | Symbol | Mult. | Wyck. | Symm. | x/a    | y/b    | z/c    | Uiso/eq |
|-----|-------|--------|-------|-------|-------|--------|--------|--------|---------|
| 1   | O     | O1     | 4     | e     | 1     | 0.0073 | 0.5080 | 0.8825 | 0.0127  |
| 2   | P     | P2     | 4     | e     | 1     | 0.4399 | 0.8334 | 0.4075 | 0.0127  |
| 3   | O     | O3     | 4     | e     | 1     | 0.4310 | 0.2236 | 0.2011 | 0.0127  |
| 4   | O     | O4     | 4     | e     | 1     | 0.9413 | 0.3485 | 0.3688 | 0.0127  |
| 5   | O     | O5     | 4     | e     | 1     | 0.0851 | 0.2274 | 0.1751 | 0.0127  |
| 6   | Na    | Na6    | 4     | e     | 1     | 0.7404 | 0.5206 | 0.4100 | 0.0127  |
| 7   | Na    | Na7    | 4     | e     | 1     | 0.7203 | 0.4746 | 0.0639 | 0.0127  |
| 8   | P     | P8     | 4     | e     | 1     | 0.1013 | 0.3222 | 0.4210 | 0.0127  |
| 9   | O     | O9     | 4     | e     | 1     | 0.5740 | 0.4842 | 0.1878 | 0.0127  |
| 10  | Zn    | Zn10   | 4     | e     | 1     | 0.9166 | 0.2201 | 0.2657 | 0.0127  |
| 11  | O     | O11    | 4     | e     | 1     | 0.9430 | 0.2070 | 0.0400 | 0.0127  |
| 12  | P     | P12    | 4     | e     | 1     | 0.9290 | 0.8221 | 0.2648 | 0.0127  |
| 13  | O     | O13    | 4     | e     | 1     | 0.0678 | 0.2279 | 0.5031 | 0.0127  |
| 14  | Zn    | Zn14   | 4     | e     | 1     | 0.1091 | 0.7145 | 0.4212 | 0.0127  |
| 15  | O     | O15    | 4     | e     | 1     | 0.5700 | 0.3398 | 0.3306 | 0.0127  |
| 16  | O     | O16    | 4     | e     | 1     | 0.2073 | 0.2429 | 0.3708 | 0.0127  |
| 17  | O     | O17    | 4     | e     | 1     | 0.2241 | 0.3587 | 0.0335 | 0.0127  |
| 18  | Na    | Na18   | 4     | e     | 1     | 0.2514 | 0.5195 | 0.2498 | 0.0127  |
| 19  | Zn    | Zn19   | 4     | e     | 1     | 0.4374 | 0.2218 | 0.4078 | 0.0127  |
| 20  | O     | O20    | 4     | e     | 1     | 0.1960 | 0.5040 | 0.4521 | 0.0127  |
| 21  | O     | O21    | 4     | e     | 1     | 0.7212 | 0.2450 | 0.1974 | 0.0127  |

**Table S3. Selection Bond Distances of NaZnPO<sub>4</sub>**

| Atom 1 | Atom 2 | Symmetry op.           | d 1,2 [Å] |
|--------|--------|------------------------|-----------|
| Zn10   | O9     | $3/2-x, -1/2+y, 1/2-z$ | 2.0470    |
| Zn10   | O4     | $x, y, z$              | 1.9007    |
| Zn10   | O5     | $1+x, y, z$            | 2.0099    |
| Zn10   | O21    | $x, y, z$              | 2.0370    |
| Zn14   | O3     | $1/2-x, 1/2+y, 1/2-z$  | 1.9031    |
| Zn14   | O17    | $1/2-x, 1/2+y, 1/2-z$  | 1.9875    |
| Zn14   | O13    | $-x, 1-y, 1-z$         | 1.9737    |
| Zn14   | O20    | $x, y, z$              | 1.9289    |
| Zn19   | O16    | $x, y, z$              | 2.0824    |
| Zn19   | O1     | $1/2+x, 1/2-y, -1/2+z$ | 2.0019    |
| Zn19   | O15    | $x, y, z$              | 1.9032    |
| Zn19   | O11    | $-1/2+x, 1/2-y, 1/2+z$ | 2.1008    |

**Table S3 (continued)**

| Atom 1 | Atom 2 | Symmetry op.           | d 1,2 [Å] |
|--------|--------|------------------------|-----------|
| P2     | O5     | $1/2-x, 1/2+y, 1/2-z$  | 1.5436    |
| P2     | O17    | $1/2-x, 1/2+y, 1/2-z$  | 1.6023    |
| P2     | O11    | $3/2-x, 1/2+y, 1/2-z$  | 1.6545    |
| P2     | O1     | $1/2+x, 3/2-y, -1/2+z$ | 1.4662    |
| P8     | O13    | $x, y, z$              | 1.4978    |
| P8     | O20    | $x, y, z$              | 1.5257    |
| P8     | O16    | $x, y, z$              | 1.5622    |
| P8     | O4     | $-1+x, y, z$           | 1.6025    |
| P12    | O15    | $3/2-x, 1/2+y, 1/2-z$  | 1.4643    |
| P12    | O9     | $3/2-x, 1/2+y, 1/2-z$  | 1.5040    |
| P12    | O3     | $3/2-x, 1/2+y, 1/2-z$  | 1.5459    |
| P12    | O21    | $3/2-x, 1/2+y, 1/2-z$  | 1.5548    |



**Table S3 (continued)**

| Atom 1 | Atom 2 | Symmetry op.         | d 1,2 [Å] |
|--------|--------|----------------------|-----------|
| Na6    | O20    | 1-x, 1-y, 1-z        | 2.1882    |
| Na6    | O4     | x, y, z              | 2.3194    |
| Na6    | O11    | 3/2-x, 1/2+y, 1/2-z  | 2.3240    |
| Na6    | O15    | x, y, z              | 2.4137    |
| Na6    | O21    | 3/2-x, 1/2+y, 1/2-z  | 2.4752    |
| Na6    | O13    | 1-x, 1-y, 1-z        | 2.9536    |
| Na7    | O9     | x, y, z              | 2.2757    |
| Na7    | O17    | 1-x, 1-y, -z         | 2.0683    |
| Na7    | O13    | 1/2+x, 1/2-y, -1/2+z | 2.3091    |
| Na7    | O1     | 1-x, 1-y, 1-z        | 2.5056    |
| Na7    | O21    | x, y, z              | 2.7643    |
| Na7    | O11    | x, y, z              | 2.9314    |
| Na18   | O16    | 1/2-x, 1/2+y, 1/2-z  | 2.6106    |
| Na18   | O3     | 1/2-x, 1/2+y, 1/2-z  | 2.4104    |
| Na18   | O5     | 1/2-x, 1/2+y, 1/2-z  | 2.4892    |
| Na18   | O9     | x, y, z              | 2.9634    |
| Na18   | O5     | x, y, z              | 3.0053    |
| Na18   | O1     | -x, 1-y, 1-z         | 3.0322    |
| Na18   | O3     | x, y, z              | 2.9598    |
| Na18   | O16    | x, y, z              | 2.9351    |

**Table S4** CIE chromaticity coordinates of NZPO 0.05 Ce<sup>3+</sup>/yTb<sup>3+</sup>:

| <b>Samples</b>                                             | <b>CIE (x, y)</b>       |
|------------------------------------------------------------|-------------------------|
| <b>NZP O : 0.05Ce<sup>3+</sup></b>                         | <b>(0.1261,0.0636)</b>  |
| <b>NZPO : 0.05Ce<sup>3+</sup>/0.01<br/>Tb<sup>3+</sup></b> | <b>(0.3366,0.5336)</b>  |
| <b>NZPO : 0.05Ce<sup>3+</sup>/0.02<br/>Tb<sup>3+</sup></b> | <b>(0.3365,0.5290)</b>  |
| <b>NZPO : 0.05Ce<sup>3+</sup>/0.04<br/>Tb<sup>3+</sup></b> | <b>(0.3439,0. 5179)</b> |
| <b>NZPO : 0.05Ce<sup>3+</sup>/0.06<br/>Tb<sup>3+</sup></b> | <b>(0.3399,0.5041)</b>  |
| <b>NZPO : 0.05Ce<sup>3+</sup>/0.08<br/>Tb<sup>3+</sup></b> | <b>(0.3388,0.5012)</b>  |
